# Supplementary material for: Formation of disinfection by-products during ballast water treatment with ozone, chlorine, and peracetic acid: influence of water quality parameters
Source: Royal Society of Chemistry journal article supplement (doi:10.1039/c5ew00061k), 2015-01-01
Supplement: c5ew00061k1.pdf [file c5ew00061k1.pdf]

Supporting Information for:

# Formation of Disinfection By-products during Ballast Water Treatment with Ozone, Chlorine, and Peracetic Acid: Influence of Water Quality Parameters

*Amisha D. Shah,<sup>§, #</sup> Zheng-Qian Liu,<sup>§, †</sup> Elisabeth Salhi,<sup>§</sup> Thomas Höfer,<sup>‡</sup> Barbara Werschkun,<sup>\*</sup>*

*and Urs von Gunten<sup>\*, §, †</sup>*

<sup>§</sup> Eawag, Swiss Federal Institute of Aquatic Science and Technology, Überlandstrasse 133, CH-8600 Dübendorf, Switzerland

<sup>†</sup> School of Environmental Science and Engineering, Huazhong University of Science and Technology, Wuhan 430074, China

<sup>‡</sup> Department Exposition Services, Federal Institute for Risk Assessment, Max-Dohrn-Strasse 8-10, D-10589 Berlin, Germany

<sup>\*</sup> Wissenschaftsbüro, Naunynstrasse 30, D-10997 Berlin, Germany

<sup>†</sup> School of Architecture, Civil and Environmental Engineering (ENAC), Ecole Polytechnique Fédérale de Lausanne (EPFL), CH-1015 Lausanne, Switzerland

<sup>#</sup> Current address: School of Civil Engineering and Division of Environmental and Ecological Engineering, Purdue University, West Lafayette, Indiana 47907

19 Pages

5 Tables

10 Figures

1 Scheme

**Table S1.** Water quality characteristics for the nine selected water sources from The Netherlands, Norway, and Germany.

| Parameter                        | Netherlands (NE)                             |                                                                  |                                                                  | Norway (NOR)                                                                 |                                                                                |                                                                                 | Germany (DE)                                               |                                                                    |                                                                            |
|----------------------------------|----------------------------------------------|------------------------------------------------------------------|------------------------------------------------------------------|------------------------------------------------------------------------------|--------------------------------------------------------------------------------|---------------------------------------------------------------------------------|------------------------------------------------------------|--------------------------------------------------------------------|----------------------------------------------------------------------------|
|                                  | F                                            | B                                                                | S                                                                | F                                                                            | B                                                                              | S                                                                               | B1                                                         | B2                                                                 | S                                                                          |
| GPS<br>(deg, min, sec)           | 52°54'52.0"N<br>5°06'07.3"E<br>(Lake IJssel) | 52°57'26.9"N<br>5°00'03.9"E<br>(Wadden Sea,<br>North<br>Holland) | 52°59'14.1"N<br>4°49'08.8"E<br>(Wadden Sea,<br>North<br>Holland) | 59°36'56.49"N<br>10°39'7.49"E<br>(surface)<br>(Solbergstrand,<br>Oslo Fjord) | 59°36'56.49"N<br>10°39'7.49"E (1<br>m depth)<br>(Solbergstrand,<br>Oslo Fjord) | 59°36'56.49"N<br>10°39'7.49"E<br>(60 m depth)<br>(Solbergstrand,<br>Oslo Fjord) | 54°31'10.0"<br>N<br>9°40'30.0"E<br>(Schlei,<br>Baltic Sea) | 54°50'10.0"N<br>9°49'60.0"E<br>(Flensburg<br>Firth, Baltic<br>Sea) | 54°07'00.0"N<br>8°51'30.0"E<br>(outside<br>Büsum<br>harbour,<br>North Sea) |
| DOC<br>(mg/L-C)                  | 4.5                                          | 3.6                                                              | 1.9                                                              | 8.8                                                                          | 2.3                                                                            | 1.2                                                                             | 6.1                                                        | 3.0                                                                | 2.5                                                                        |
| SUVA<br>(L/(mg×m))               | 3.41                                         | 2.68                                                             | 2.11                                                             | 3.73                                                                         | 2.0                                                                            | 1.0                                                                             | 3.1                                                        | 1.38                                                               | 2.18                                                                       |
| pH                               | 8.4                                          | 7.9                                                              | 8.0                                                              | 8.1                                                                          | 8.04                                                                           | 7.91                                                                            | 8.2                                                        | 8.0                                                                | 8.0                                                                        |
| Alkalinity<br>(mM)               | 2.01                                         | 2.31                                                             | 2.52                                                             | 1.28                                                                         | 2.1                                                                            | 2.38                                                                            | 3.26                                                       | 2.16                                                               | 2.15                                                                       |
| Ammonia<br>(µg-N/L) <sup>a</sup> | 100.4                                        | -                                                                | -                                                                | 7.2                                                                          | -                                                                              | -                                                                               | 173.6                                                      | -                                                                  | -                                                                          |
| Bromide (mg/L<br>(µM))           | 0.3 (3.75)                                   | 38.4 (480)                                                       | 62.6 (782)                                                       | 0.044 (0.09)                                                                 | 54.5 (681)                                                                     | 68.5 (856)                                                                      | 12 (150)                                                   | 42 (525)                                                           | 54 (675)                                                                   |
| Chloride (M)                     | $3.46 \times 10^{-3}$                        | 0.2911                                                           | 0.466                                                            | $5.72 \times 10^{-4}$                                                        | 0.431                                                                          | 0.510                                                                           | 0.092                                                      | 0.343                                                              | 0.436                                                                      |

<sup>a</sup> cannot be measured in high salinity waters due to analytical interferences

**Table S2.** List of kinetic experiments and parameters tested for the NE and NOR waters for treatment with ozone, free chlorine, and PAA at a dose of 5.0 mg/L (104  $\mu$ M), 7.4 mg/L-Cl<sub>2</sub> (104  $\mu$ M), and 150 mg/L (2.0 mM), respectively.

| Water         | Oxidant       | Temp (C) | Tested Parameters |                          |                          |        |        |                          |                          |
|---------------|---------------|----------|-------------------|--------------------------|--------------------------|--------|--------|--------------------------|--------------------------|
|               |               |          | Bromate           | Primary Oxidant Residual | Secondary Oxidant (HOBr) | THMs   | HAAs   | Primary Oxidant Residual | Secondary Oxidant (HOBr) |
| Reaction time |               |          | 15 min            | 15 min                   | 15 min                   | 5 days | 5 days | 5 days                   | 5 days                   |
| NE-F          | Ozone         | 22       | ×                 | ×                        | ×                        | ×      |        |                          | ×                        |
| NE-F          | Ozone         | 4        | ×                 | ×                        | ×                        | ×      |        |                          | ×                        |
| NE-B          | Ozone         | 22       | ×                 | ×                        | ×                        | ×      |        |                          | ×                        |
| NE-B          | Ozone         | 4        | ×                 | ×                        | ×                        |        |        |                          |                          |
| NE-S          | Ozone         | 22       | ×                 | ×                        | ×                        | ×      |        |                          | ×                        |
| NE-S          | Ozone         | 4        | ×                 | ×                        | ×                        | ×      |        |                          | ×                        |
| NE-F          | Free chlorine | 22       |                   |                          |                          | ×      |        | ×                        | ×                        |
| NE-F          | Free chlorine | 4        |                   |                          |                          | ×      |        | ×                        | ×                        |
| NE-B          | Free chlorine | 22       |                   |                          |                          | ×      |        | ×                        | ×                        |
| NE-B          | Free chlorine | 4        |                   |                          |                          | ×      |        | ×                        | ×                        |
| NE-S          | Free chlorine | 22       |                   |                          |                          | ×      |        | ×                        | ×                        |
| NE-S          | Free chlorine | 4        |                   |                          |                          | ×      |        | ×                        | ×                        |
| NE-F          | PAA           | 22       |                   |                          |                          | ×      |        | ×                        | ×                        |
| NE-F          | PAA           | 4        |                   |                          |                          | ×      |        | ×                        | ×                        |
| NE-B          | PAA           | 22       |                   |                          |                          | ×      |        | ×                        | ×                        |
| NE-B          | PAA           | 4        |                   |                          |                          | ×      |        | ×                        | ×                        |
| NE-S          | PAA           | 22       |                   |                          |                          | ×      |        | ×                        | ×                        |
| NE-S          | PAA           | 4        |                   |                          |                          | ×      |        | ×                        | ×                        |
| NOR-F         | Ozone         | 22       | ×                 | ×                        | ×                        |        | ×      | ×                        | ×                        |
| NOR-F         | Ozone         | 4        | ×                 | ×                        | ×                        |        | ×      | ×                        | ×                        |
| NOR-B         | Ozone         | 22       | ×                 | ×                        | ×                        |        | ×      | ×                        | ×                        |

|       |               |    |   |   |   |  |   |   |   |
|-------|---------------|----|---|---|---|--|---|---|---|
| NOR-B | Ozone         | 4  | × | × | × |  | × | × | × |
| NOR-S | Ozone         | 22 | × | × | × |  | × | × | × |
| NOR-S | Ozone         | 4  | × | × | × |  | × | × | × |
| NOR-F | Free chlorine | 22 |   |   |   |  | × | × | × |
| NOR-F | Free chlorine | 4  |   |   |   |  | × | × | × |
| NOR-B | Free chlorine | 22 |   |   |   |  | × | × | × |
| NOR-B | Free chlorine | 4  |   |   |   |  | × | × | × |
| NOR-S | Free chlorine | 22 |   |   |   |  | × | × | × |
| NOR-S | Free chlorine | 4  |   |   |   |  | × | × | × |
| NOR-F | PAA           | 22 |   |   |   |  | × | × | × |
| NOR-F | PAA           | 4  |   |   |   |  | × | × | × |
| NOR-B | PAA           | 22 |   |   |   |  | × | × | × |
| NOR-B | PAA           | 4  |   |   |   |  | × | × | × |
| NOR-S | PAA           | 22 |   |   |   |  | × | × | × |
| NOR-S | PAA           | 4  |   |   |   |  | × | × | × |

**Table S3.** List of dosage experiments and parameters tested for the NOR and DE waters in which NOR and DE waters were exposed to various dosages of ozone, free chlorine, and PAA from 0.5-5.0 mg/L (10-104  $\mu$ M), 1-9 mg/L-Cl<sub>2</sub> (14-126  $\mu$ M), and 7.5-150 mg/L (0.1-2 mM), respectively, at 22 $\pm$ 2°C for one reaction time between 18 to 26 h.

| Water | Oxidant       | Temp (C) | Reaction time (Bromate/HAA/Primary Oxidant Residual/HOBr) | Reaction time (THMs) | Tested Parameters |      |     |                          |                          |
|-------|---------------|----------|-----------------------------------------------------------|----------------------|-------------------|------|-----|--------------------------|--------------------------|
|       |               |          |                                                           |                      | Bromate           | THMs | HAA | Primary Oxidant Residual | Secondary Oxidant (HOBr) |
| NOR-F | Ozone         | 22       | 24 h                                                      | 24 h                 | ×                 | ×    | ×   |                          | ×                        |
| NOR-B | Ozone         | 22       | 24 h                                                      | 24 h                 | ×                 | ×    | ×   |                          | ×                        |
| NOR-S | Ozone         | 22       | 24 h                                                      | 24 h                 | ×                 | ×    | ×   |                          | ×                        |
| NOR-F | Free chlorine | 22       | 24 h                                                      | 24 h                 | ×                 | ×    | ×   | ×                        | ×                        |
| NOR-B | Free chlorine | 22       | 24 h                                                      | 24 h                 | ×                 | ×    | ×   | ×                        | ×                        |
| NOR-S | Free chlorine | 22       | 24 h                                                      | 24 h                 | ×                 | ×    | ×   | ×                        | ×                        |
| NOR-F | PAA           | 22       | 18.3 h                                                    | 24 h                 | ×                 | ×    | ×   |                          |                          |
| NOR-B | PAA           | 22       | 18.3 h                                                    | 24 h                 | ×                 | ×    | ×   |                          |                          |
| NOR-S | PAA           | 22       | 18.3 h                                                    | 24 h                 | ×                 | ×    | ×   |                          |                          |
| DE-B1 | Ozone         | 22       | 24 h                                                      | 24 h                 | ×                 | ×    | ×   |                          | ×                        |
| DE-B1 | Ozone         | 22       | 24 h                                                      | 24 h                 | ×                 | ×    | ×   |                          | ×                        |
| DE-B1 | Ozone         | 22       | 24 h                                                      | 24 h                 | ×                 | ×    | ×   |                          | ×                        |
| DE-B2 | Free chlorine | 22       | 26 h                                                      | 24 h                 | ×                 | ×    | ×   | ×                        | ×                        |
| DE-B2 | Free chlorine | 22       | 26 h                                                      | 24 h                 | ×                 | ×    | ×   | ×                        | ×                        |
| DE-B2 | Free chlorine | 22       | 26 h                                                      | 24 h                 | ×                 | ×    | ×   | ×                        | ×                        |
| DE-S  | PAA           | 22       | 22 h                                                      | 24 h                 | ×                 | ×    | ×   |                          |                          |
| DE-S  | PAA           | 22       | 22 h                                                      | 24 h                 | ×                 | ×    | ×   |                          |                          |
| DE-S  | PAA           | 22       | 22 h                                                      | 24 h                 | ×                 | ×    | ×   |                          |                          |

**Table S4.** Parent and product masses, collision energies, and S-lens RF amplitude values for, bromate, HAAs, internal, and surrogate standards measured in this study.

| HAA                  | Parent mass ( <i>m/z</i> ) | Product mass ( <i>m/z</i> ) | Collision Energy (V) | S-lens RF amplitude (V) |
|----------------------|----------------------------|-----------------------------|----------------------|-------------------------|
| Bromate              | 126.9                      | 110.9                       | 25                   | 85                      |
| Bromate              | 128.6                      | 112.9                       | 25                   | 85                      |
| MCAA                 | 93.00                      | 35.0                        | 12                   | 40                      |
| MBAA                 | 136.920                    | 79                          | 13                   | 36                      |
| MBAA-C <sup>13</sup> | 139.930                    | 81.0                        | 13                   | 36                      |
| DCAA                 | 126.94                     | 82.94                       | 12                   | 42                      |
| DCAA-C <sup>13</sup> | 127.94                     | 83.9                        | 12                   | 42                      |
| BCAA                 | 172.9                      | 128.9                       | 12                   | 50                      |
| DBAA                 | 216.85                     | 172.9                       | 13                   | 47                      |
| TCAA                 | 160.9                      | 116.9                       | 9                    | 30                      |
| TBAA                 | 252.82                     | 81.0                        | 25                   | 75                      |
| BDCAA                | 162.9                      | 81.0                        | 15                   | 50                      |
| DBCAA                | 206.85                     | 79.0                        | 17                   | 50                      |
| 2-BrBu               | 165.00                     | 79.0                        | 16                   | 30                      |

**Table S5.** A kinetic model was established using Kintecus®<sup>1</sup> in order to predict bromate formation in bromide-containing synthetic waters. The equations used to perform this model are listed below:

| k (M <sup>-1</sup> s <sup>-1</sup> ) | Equation                                                                                                       | Description                                                                                                         |
|--------------------------------------|----------------------------------------------------------------------------------------------------------------|---------------------------------------------------------------------------------------------------------------------|
| 1.66e+9                              | HOBr ==> OBr <sup>-a</sup>                                                                                     | Forward reaction for hypobromous acid equilibrium (k <sub>f</sub> ); μ = 0 M; 20 C; Eigen et al. 1962 <sup>2</sup>  |
| 8.34e+9                              | OBr <sup>-</sup> ==> HOBr <sup>a</sup>                                                                         | Backward reaction for hypobromous acid equilibrium (k <sub>b</sub> ); μ = 0 M; 20 C; Eigen et al. 1962 <sup>2</sup> |
| 160/258                              | O <sub>3</sub> + Br <sup>-</sup> ==> OBr <sup>-</sup> + O <sub>2</sub>                                         | Haag and Hoigné 1983 <sup>3</sup> , Liu et al. 2001 <sup>4</sup>                                                    |
| 1.00E+02                             | O <sub>3</sub> + OBr <sup>-</sup> ==> BrO <sub>2</sub> <sup>-</sup> + O <sub>2</sub>                           | von Sonntag and von Gunten 2012 <sup>5</sup>                                                                        |
| 3.30E+02                             | O <sub>3</sub> + OBr <sup>-</sup> ==> Br <sup>-</sup> + 2O <sub>2</sub>                                        | von Sonntag and von Gunten 2012 <sup>5</sup>                                                                        |
| 1.00E+6                              | O <sub>3</sub> + BrO <sub>2</sub> <sup>-</sup> ==> BrO <sub>3</sub> <sup>-</sup> + O <sub>2</sub> <sup>b</sup> | von Sonntag and von Gunten 2012 <sup>5</sup>                                                                        |

<sup>a</sup> These reaction rate constants were estimated by first assuming that k<sub>f</sub>/k<sub>b</sub> is equal to [OBr<sup>-</sup>]/[HOBr] which is equal to 1.66×10<sup>9</sup>/8.34×10<sup>9</sup> given that this is the ratio between the two acid-base species at pH 8.0. For other pH values different ratios of k<sub>f</sub>/k<sub>b</sub> were selected. The values were set to be at 10<sup>9</sup> since it is a rapid acid-base equilibrium reaction.

<sup>b</sup> The reaction rate is stated to be > 1×10<sup>5</sup> M<sup>-1</sup>s<sup>-1</sup> (see reaction 3 in main manuscript). Therefore, a value of 1×10<sup>6</sup> M<sup>-1</sup>s<sup>-1</sup> was selected but could be set up to 1×10<sup>10</sup> M<sup>-1</sup>s<sup>-1</sup> with no significant effect on the modeling results.

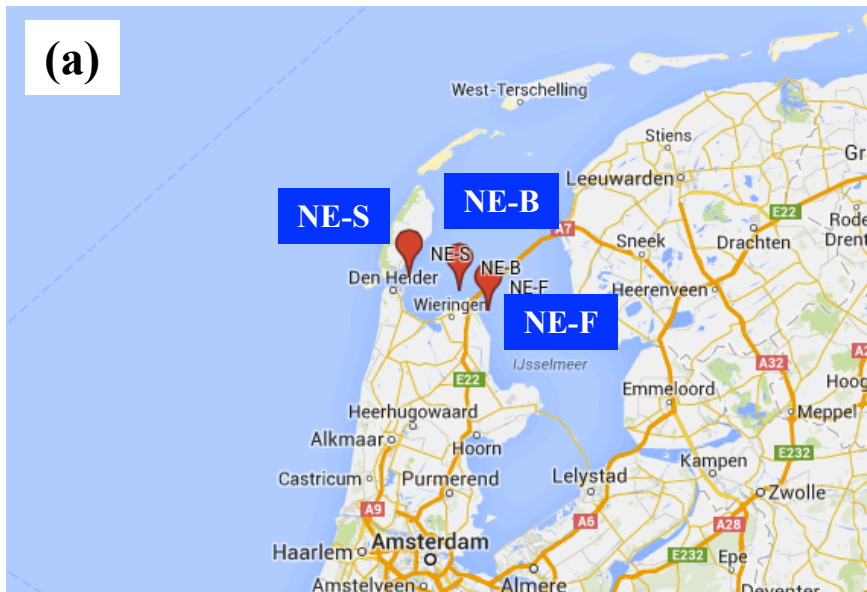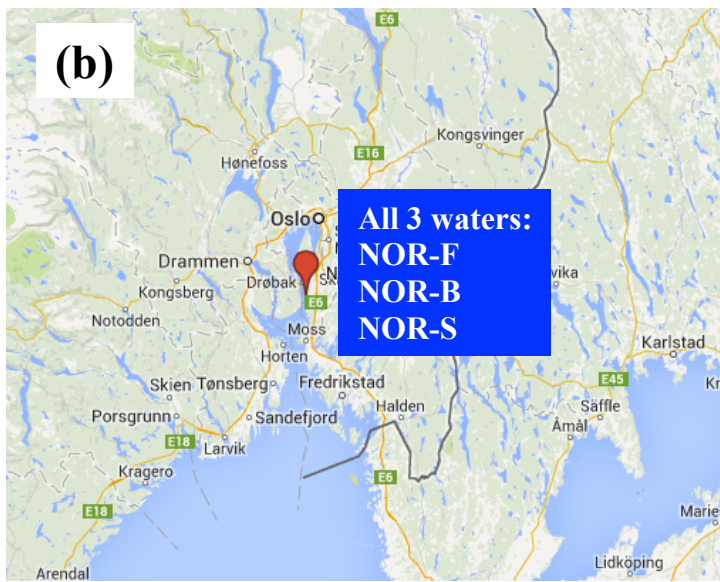



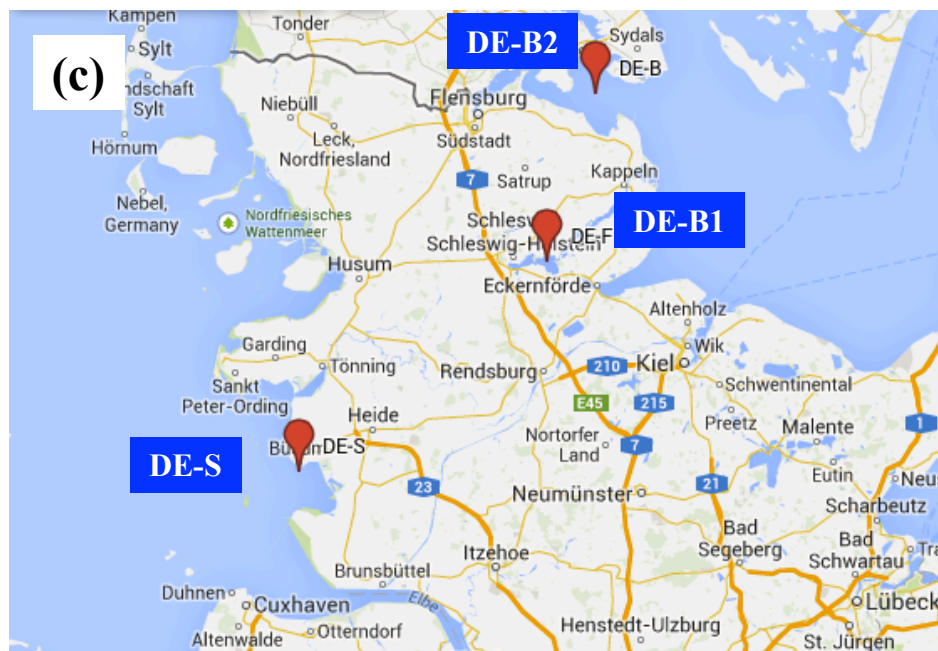

**Figure S1.** Map locations for the nine waters from (a) The Netherlands, (b) Norway, and (c) Germany.

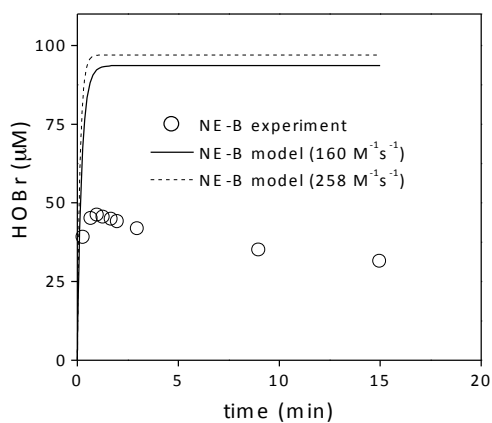

**Figure S2.** Comparison of the HOB<sub>r</sub> formed when the NE-B water was ozonated to measure bromate formation. The experimental data are identical to those presented in Figure 1e, and the two model curves were simulated using Kintecus® in which the reaction rate for reaction 1 was either 160 or 258 M<sup>-1</sup>s<sup>-1</sup> and the initial conditions are identical to the experimental data ([Br<sup>-</sup>]<sub>0</sub> = 38.4 mg/L (480 µM), [O<sub>3</sub>]<sub>0</sub> = 5.0 mg/L (104 µM), pH 7.9).

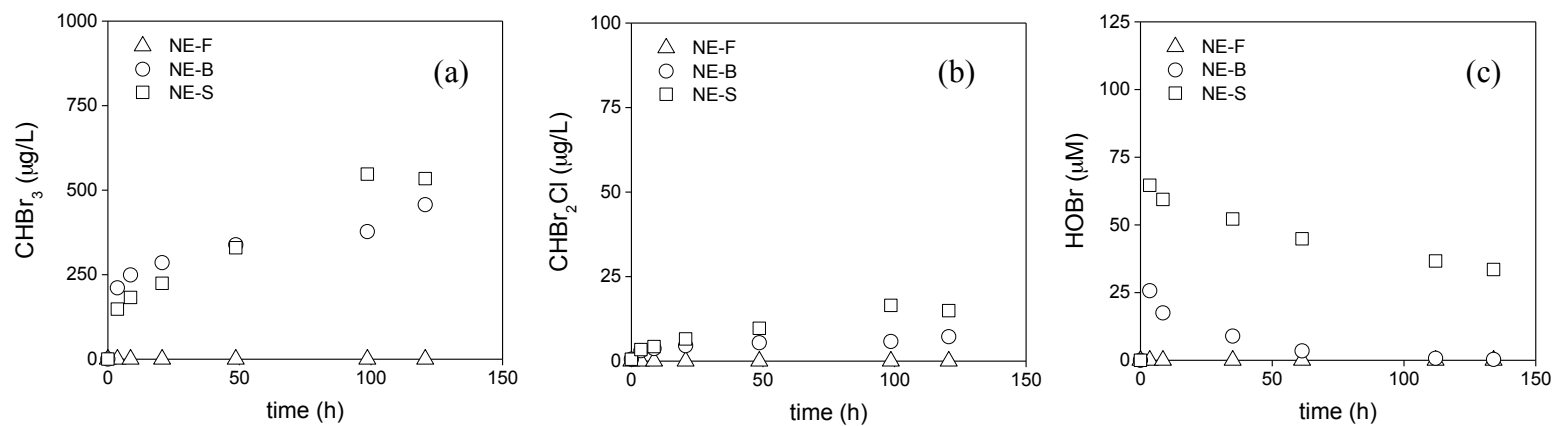

**Figure S3.** Formation of (a) CHBr<sub>3</sub> (b) CHBr<sub>2</sub>Cl and (c) HOBr over 5 days (120 h) during ozonation (5.0 mg/L) of the NE-F, NE-B, and NE-S waters (pH 7.8-8.1 for all three waters).

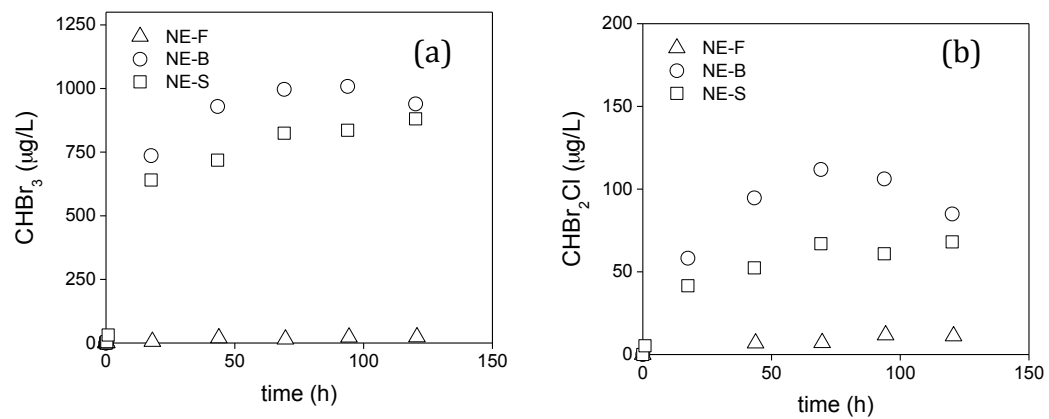

**Figure S4.** Formation of (a)  $\text{CHBr}_3$  and (b)  $\text{CHBr}_2\text{Cl}$  over 5 days (120 h) during PAA treatment (150 mg/L) of the NE-F, NE-B, and NE-S waters (pH = 6.1-6.4 (NE-F); pH = 7.0-7.3 (NE-B); pH = 7.1-7.5 (NE-S))

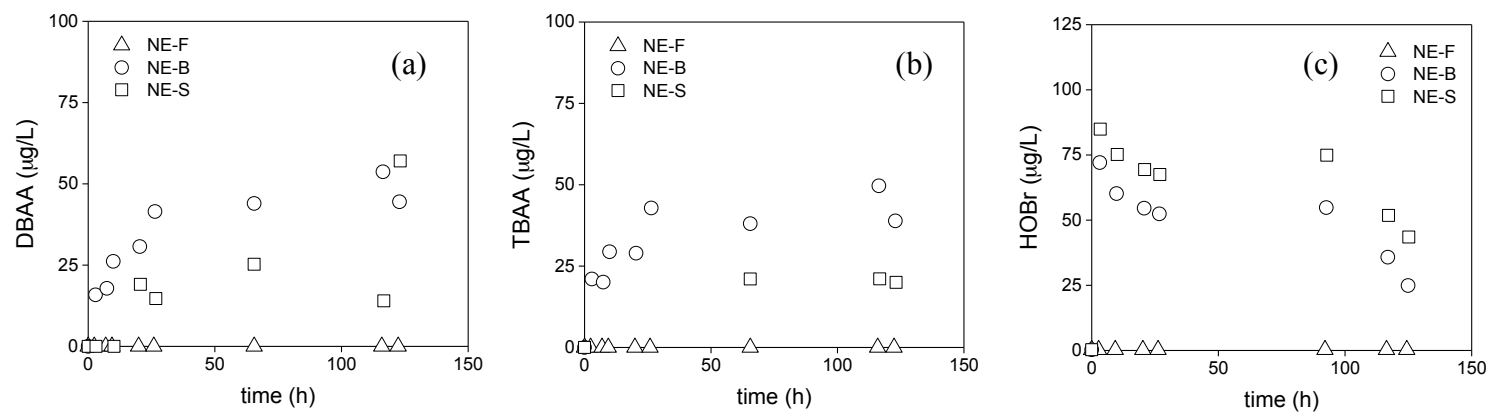

**Figure S5.** Formation of (a) DBAA (b) TBAA and (c) HOBr over 5 days (120 h) during ozonation (5.0 mg/L) of the NOR-F, NOR-B, and NOR-S waters (pH 7.6-8.0 for all three waters). The slight increase in the HOBr value at 90 min in Figure S5c is likely due to an experimental error.

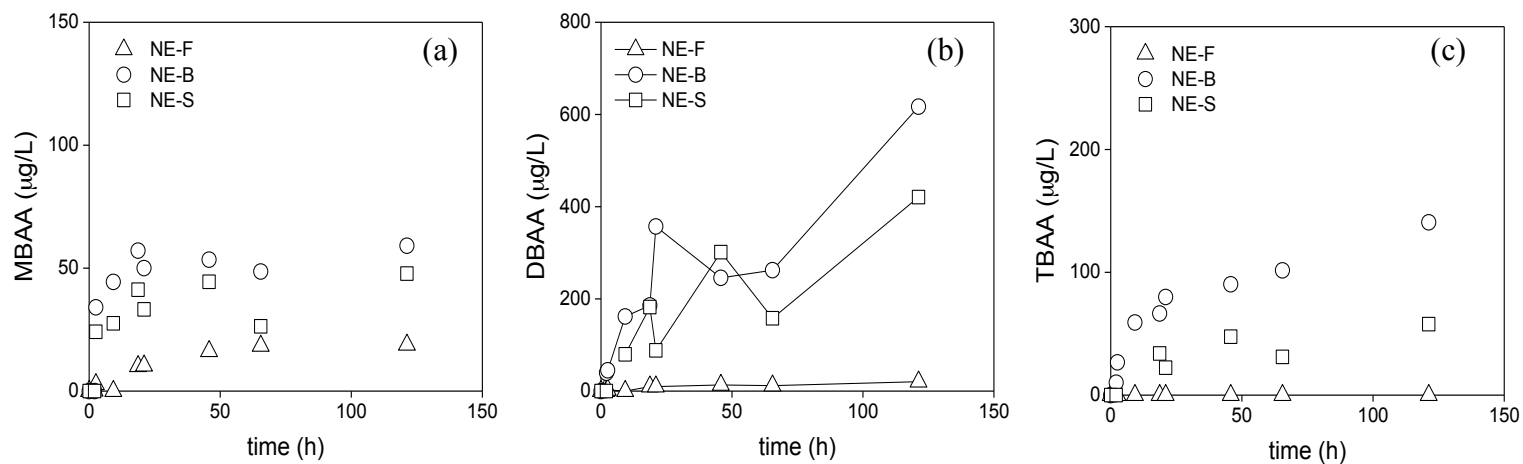

**Figure S6.** Formation of (a) MBAA, (b) DBAA, and (c) TBAA over 5 days (120 h) following PAA treatment (150 mg/L) of the NOR-F, NOR-B, and NOR-S waters (pH 6.8-7.2 for all three waters). The scatter in data presented in Figure S6b has been verified to not be due to analytical error but is most likely due to experimental error.

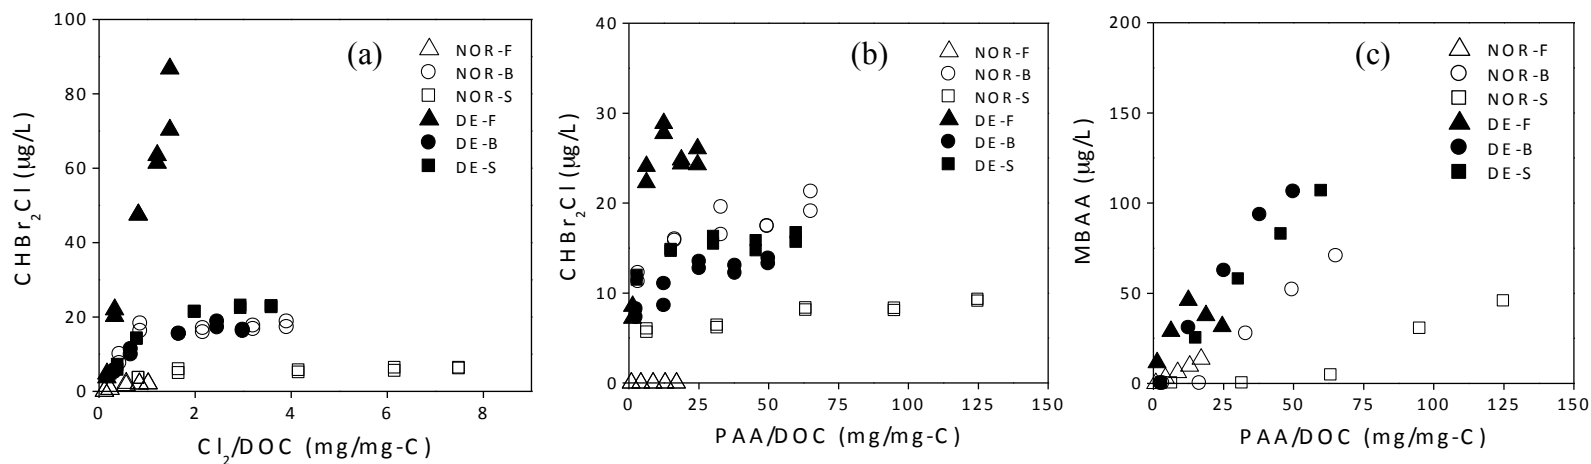

**Figure S7.** Formation of (a) CHBr<sub>2</sub>Cl during chlorination (b) CHBr<sub>2</sub>Cl during PAA treatment, and (c) MBAA during PAA treatment for the NOR and DE waters for various specific doses of each oxidant. The x-axis is plotted as the specific oxidant dose normalized to the DOC concentration (mg/mg C).

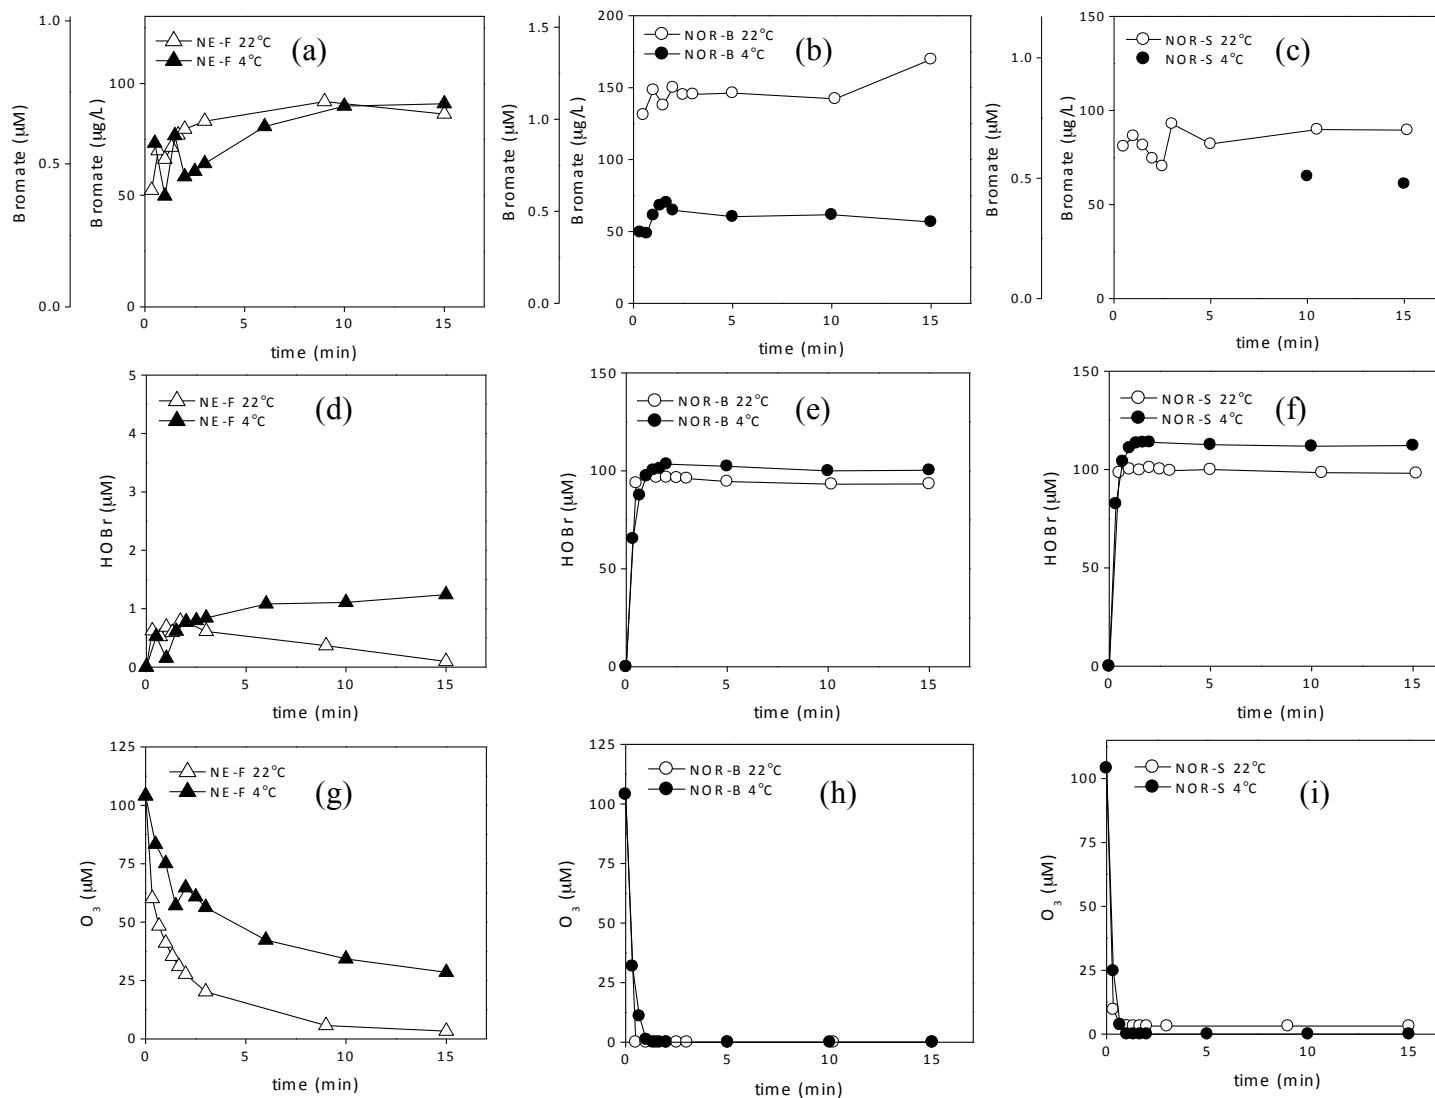

**Figure S8.** Effect of temperature,  $22\pm 2^\circ\text{C}$  and  $4\pm 2^\circ\text{C}$ , on (a-c) bromate formation, (d-f) HOBr formation, and (g-i) the ozone residual concentration when the NE and NOR waters were ozonated ( $[\text{O}_3]_0 = 5 \text{ mg/L}; 104 \mu\text{M}$ ) over 15 min. The temperature dependence for the NOR-F water was not evaluated.

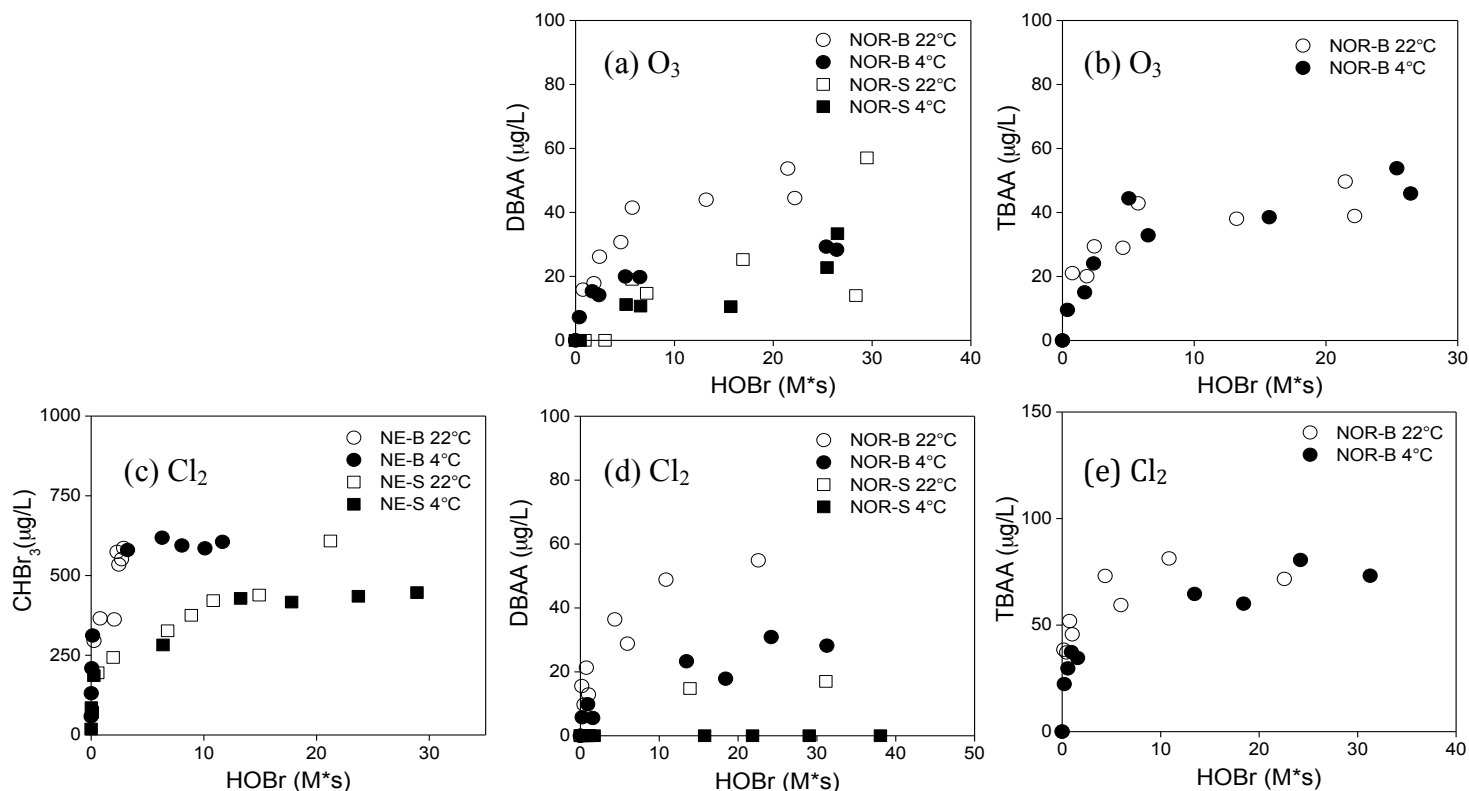

**Figure S9.** Effect of temperature,  $22\pm 2^\circ\text{C}$  and  $4\pm 2^\circ\text{C}$ , on Br-DBP formation plotted against the HOBr exposure over 5 days (120 h) when the NE and NOR waters were (a-b) ozonated ( $[\text{O}_3]_0 = 5 \text{ mg/L}; 104 \mu\text{M}$ ) and (c-e) chlorinated ( $[\text{Cl}_2]_0 = 7.4 \text{ mg/L-Cl}_2; 104 \mu\text{M}$ ). Similar plots for such waters treated with PAA could not be established since the HOBr concentration was not measured for these experiments. Similar to Figure 7 (main manuscript), the temperature dependence for  $\text{CHBr}_3$  formation was only evaluated in the NE waters and not evaluated during ozonation. The temperature dependence for DBAA and TBAA formation was only evaluated in the NOR waters.



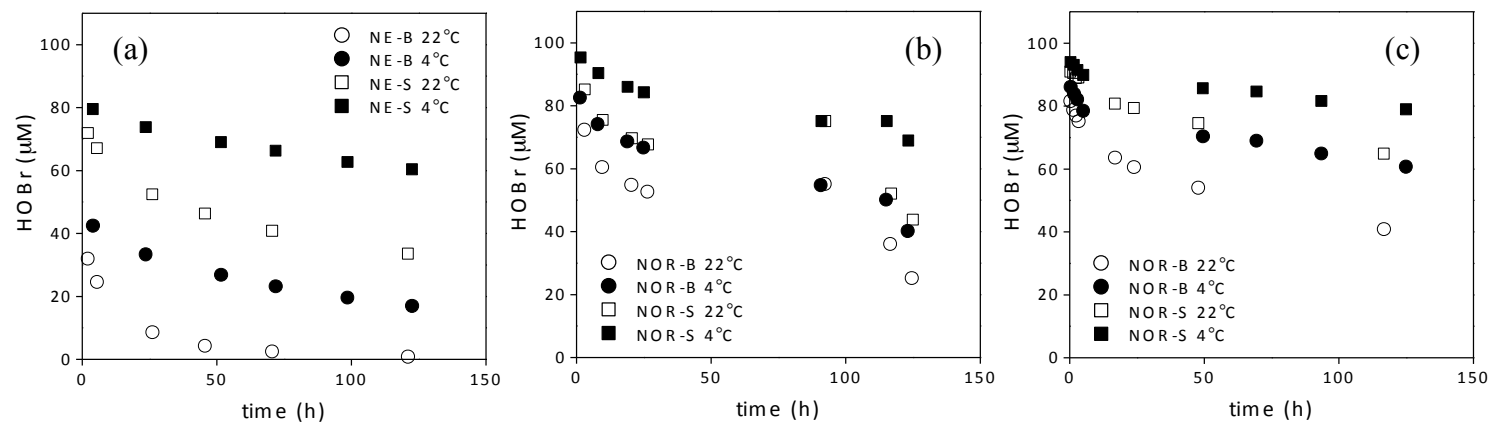

**Figure S10.** Effect of temperature,  $22\pm 2^\circ\text{C}$  and  $4\pm 2^\circ\text{C}$ , on HOBr formation over 5 days (120 h) when (a) the NE-B and NE-S waters were chlorinated ( $[\text{Cl}_2]_0 = 7.4 \text{ mg/L-Cl}_2; 104 \mu\text{M}$ ) and when the NOR-B and NOR-S water were either (b) ozonated ( $[\text{O}_3]_0 = 5 \text{ mg/L}; 104 \mu\text{M}$ ) or (c) chlorinated ( $[\text{Cl}_2]_0 = 7.4 \text{ mg/L-Cl}_2; 104 \mu\text{M}$ ).

**Scheme S1.** Simplified reaction scheme for THM and HAA (di- and tri-halogenated) formation following chlorination of natural organic matter (NOM). Adapted from Hua and Reckhow 2008.<sup>6</sup>

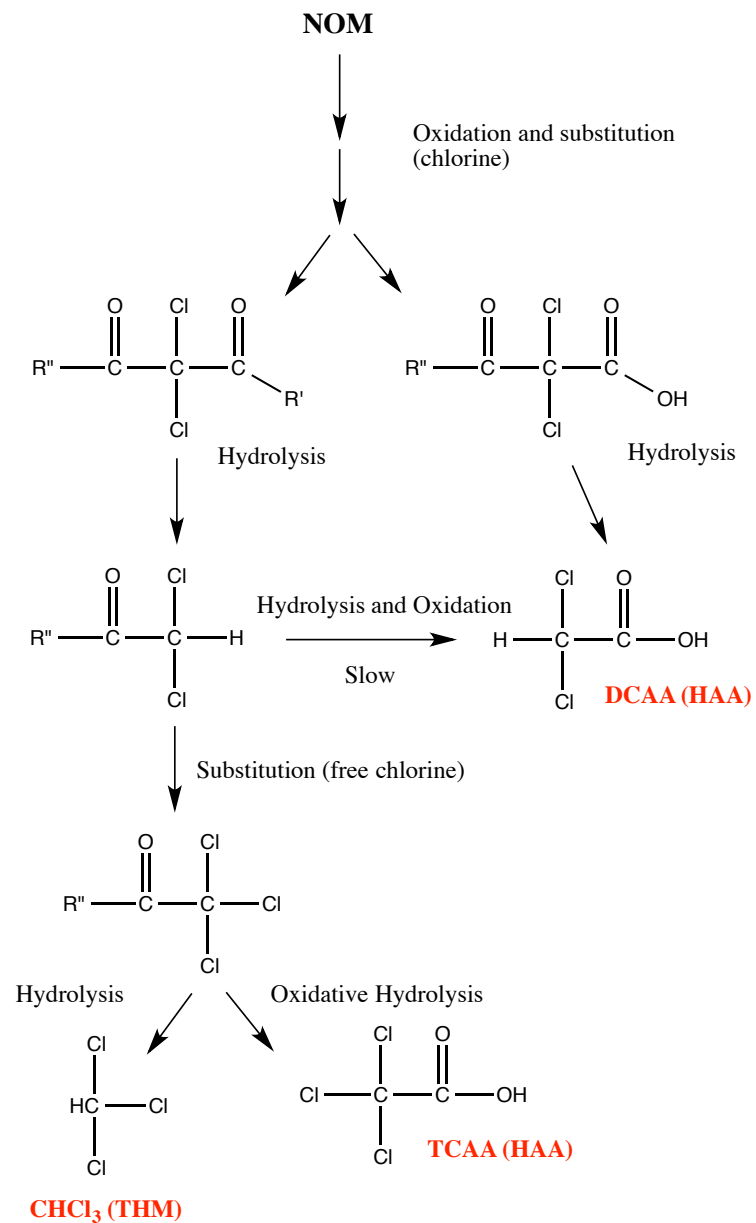

## References

1. J. C. Ianni, in *Kintecus, Windows Version 5.2, 2014*, <http://www.kintecus.com>.
2. M. Eigen and K. Kustin, *J. Am. Chem. Soc.*, 1962, **84**, 1355-1361.
3. W. R. Haag and J. Hoigné, *Environ. Sci. Technol.*, 1983, **17**, 261-267.
4. Q. Liu, L. M. Schurter, C. E. Muller, S. Aloisio, J. S. Francisco and D. W. Margerum, *Inorg. Chem.*, 2001, **40**, 4436-4442.
5. C. von Sonntag and U. von Gunten, *Chemistry of ozone in water and wastewater treatment: From basic principles to applications*, IWA Publishing, London, 2012.
6. G. H. Hua and D. A. Reckhow, *J. Am. Water Works Ass.*, 2008, **100**, 82-95.
